# Supplementary material for: Influence of substrate types and morphological traits on movement behavior in a toad and newt species
Source: PeerJ. 2019 Jan 9;6:e6053. doi: 10.7717/peerj.6053 (PMC6330043; doi:10.7717/peerj.6053)
Supplement: Supplemental Information 1 — SVL: snout-to-vent length; HLL: hind limb length; F: females; M: males; body mass in g; TM: Triturus marmoratus; BB: Bufo bufo; Mi: scaled mass index. [file peerj-07-6053-s001.xlsx]

## Sheet: BB
Date	ID	Body mass	Species	Sex	Site	SVL	HLL	Replicate	Substrate	Velocity	Number of stops	Crossing	Mi
2015-03-18	5701	66.55	BB	M	Tourtouse	8.1	10.9	1	Cement	30.7	14	15.35	7.35518
2015-03-18	5701	66.55	BB	M	Tourtouse	8.1	10.9	2	Cement	34.8	15	17.4	7.35518
2015-03-19	5701	66.55	BB	M	Tourtouse	8.1	10.9	3	Cement	21.6	8	10.8	7.35518
2015-03-18	5788	59.92	BB	M	Tourtouse	8	10.6	1	Cement	26.2	13	13.1	9.75418
2015-03-18	5788	59.92	BB	M	Tourtouse	8	10.6	2	Cement	12.9	5	6.45	9.75418
2015-03-19	5788	59.92	BB	M	Tourtouse	8	10.6	3	Cement	9.2	1	4.6	9.75418
2015-03-18	5910	57.49	BB	M	Tourtouse	8	10.5	1	Cement	16.8	12	8.4	9.35861
2015-03-18	5910	57.49	BB	M	Tourtouse	8	10.5	2	Cement	23.8	10	11.9	9.35861
2015-03-19	5910	57.49	BB	M	Tourtouse	8	10.5	3	Cement	23.2	13	11.6	9.35861
2015-03-18	5950	41.52	BB	M	Tourtouse	7.25	9.55	1	Cement	29.1	17	14.55	145.392
2015-03-18	5950	41.52	BB	M	Tourtouse	7.25	9.55	2	Cement	21	10	10.5	145.392
2015-03-19	5950	41.52	BB	M	Tourtouse	7.25	9.55	3	Cement	17.8	7	8.9	145.392
2015-03-18	5759	47.34	BB	M	Tourtouse	7.35	10.3	1	Cement	14.9	6	7.45	108.158
2015-03-18	5759	47.34	BB	M	Tourtouse	7.35	10.3	2	Cement	18.6	8	9.3	108.158
2015-03-19	5759	47.34	BB	M	Tourtouse	7.35	10.3	3	Cement	15.4	5	7.7	108.158
2015-03-18	5780	42.87	BB	M	Tourtouse	7.2	10.05	1	Cement	13.6	7	6.8	186.262
2015-03-18	5780	42.87	BB	M	Tourtouse	7.2	10.05	2	Cement	21	11	10.5	186.262
2015-03-19	5780	42.87	BB	M	Tourtouse	7.2	10.05	3	Cement	14.1	8	7.05	186.262
2015-03-18	6290	60.51	BB	M	Tourtouse	8	11.1	1	Cement	18.1	11	9.05	9.85023
2015-03-18	6290	60.51	BB	M	Tourtouse	8	11.1	2	Cement	16.3	9	8.15	9.85023
2015-03-19	6290	60.51	BB	M	Tourtouse	8	11.1	3	Cement	23.7	13	11.85	9.85023
2015-03-18	6234	46.75	BB	M	Tourtouse	7.6	10.8	1	Cement	24.2	12	12.1	37.6531
2015-03-18	6234	46.75	BB	M	Tourtouse	7.6	10.8	2	Cement	27.4	11	13.7	37.6531
2015-03-19	6234	46.75	BB	M	Tourtouse	7.6	10.8	3	Cement	18.5	8	9.25	37.6531
2015-03-18	5819	35.18	BB	M	Tourtouse	7.2	9.3	1	Cement	13.3	3	6.65	152.851
2015-03-18	5819	35.18	BB	M	Tourtouse	7.2	9.3	2	Cement	14	3	7	152.851
2015-03-19	5819	35.18	BB	M	Tourtouse	7.2	9.3	3	Cement	15.8	3	7.9	152.851
2015-03-18	6011	38.86	BB	M	Mas_d_Azil	7.6	9.5	1	Cement	25	11	12.5	31.2984
2015-03-18	6011	38.86	BB	M	Mas_d_Azil	7.6	9.5	2	Cement	23.2	13	11.6	31.2984
2015-03-19	6011	38.86	BB	M	Mas_d_Azil	7.6	9.5	3	Cement	15	8	7.5	31.2984
2015-03-18	6194	43.5	BB	M	Tourtouse	7.6	10.4	1	Cement	16.2	9	8.1	35.0355
2015-03-18	6194	43.5	BB	M	Tourtouse	7.6	10.4	2	Cement	21.7	13	10.85	35.0355
2015-03-19	6194	43.5	BB	M	Tourtouse	7.6	10.4	3	Cement	15	11	7.5	35.0355
2015-03-18	6375	43.05	BB	M	Tourtouse	7.4	9.9	1	Cement	19.7	5	9.85	79.62
2015-03-18	6375	43.05	BB	M	Tourtouse	7.4	9.9	2	Cement	20.7	10	10.35	79.62
2015-03-19	6375	43.05	BB	M	Tourtouse	7.4	9.9	3	Cement	16.4	7	8.2	79.62
2015-03-18	6530	39.99	BB	M	Tourtouse	7.3	9.7	1	Cement	19.7	8	9.85	113.029
2015-03-18	6530	39.99	BB	M	Tourtouse	7.3	9.7	2	Cement	17.3	11	8.65	113.029
2015-03-19	6530	39.99	BB	M	Tourtouse	7.3	9.7	3	Cement	15.4	11	7.7	113.029
2015-03-18	6254	53.26	BB	M	Tourtouse	8	10.75	1	Cement	11.7	3	5.85	8.67002
2015-03-18	6254	53.26	BB	M	Tourtouse	8	10.75	2	Cement	8.5	1	4.25	8.67002
2015-03-19	6254	53.26	BB	M	Tourtouse	8	10.75	3	Cement	32.5	12	16.25	8.67002
2015-03-26	5749	56.25	BB	M	Tourtouse	8.3	10.2	1	Cement	45	11	22.5	2.90643
2015-03-26	5749	56.25	BB	M	Tourtouse	8.3	10.2	2	Cement	14.8	4	7.4	2.90643
2015-03-27	5749	56.25	BB	M	Tourtouse	8.3	10.2	3	Cement	10.4	2	5.2	2.90643
2015-03-26	797	51.34	BB	M	Tourtouse	7.8	10.6	1	Cement	20.2	9	10.1	18.4002
2015-03-26	797	51.34	BB	M	Tourtouse	7.8	10.6	2	Cement	12.5	8	6.25	18.4002
2015-03-27	797	51.34	BB	M	Tourtouse	7.8	10.6	3	Cement	18.1	9	9.05	18.4002
2015-03-26	6236	74.46	BB	M	Tourtouse	8.9	11.1	1	Cement	32.7	12	16.35	0.436795
2015-03-26	6236	74.46	BB	M	Tourtouse	8.9	11.1	2	Cement	39.3	10	19.65	0.436795
2015-03-27	6236	74.46	BB	M	Tourtouse	8.9	11.1	3	Cement	41.3	15	20.65	0.436795
2015-03-26	6613	58.63	BB	M	Tourtouse	7.9	10.6	1	Cement	9.6	4	4.8	14.1263
2015-03-26	6613	58.63	BB	M	Tourtouse	7.9	10.6	2	Cement	27.5	12	13.75	14.1263
2015-03-27	6613	58.63	BB	M	Tourtouse	7.9	10.6	3	Cement	26.5	11	13.25	14.1263
2015-03-26	6469	75.2	BB	M	Tourtouse	8.9	11.2	1	Cement	29.6	9	14.8	0.441136
2015-03-26	6469	75.2	BB	M	Tourtouse	8.9	11.2	2	Cement	46.4	17	23.2	0.441136
2015-03-27	6469	75.2	BB	M	Tourtouse	8.9	11.2	3	Cement	20.1	13	10.05	0.441136
2015-03-26	6261	50.73	BB	M	Tourtouse	8	10.7	1	Cement	39.6	13	19.8	8.25817
2015-03-26	6261	50.73	BB	M	Tourtouse	8	10.7	2	Cement	24.3	8	12.15	8.25817
2015-03-27	6261	50.73	BB	M	Tourtouse	8	10.7	3	Cement	33.2	14	16.6	8.25817
2015-03-26	6273	56.33	BB	M	Tourtouse	8.1	11.2	1	Cement	11.9	4	5.95	6.22565
2015-03-26	6273	56.33	BB	M	Tourtouse	8.1	11.2	2	Cement	14.6	4	7.3	6.22565
2015-03-27	6273	56.33	BB	M	Tourtouse	8.1	11.2	3	Cement	13.3	4	6.65	6.22565
2015-03-26	6285	62.47	BB	M	Tourtouse	8.05	10.85	1	Cement	16.9	6	8.45	8.37418
2015-03-26	6285	62.47	BB	M	Tourtouse	8.05	10.85	2	Cement	42.4	13	21.2	8.37418
2015-03-27	6285	62.47	BB	M	Tourtouse	8.05	10.85	3	Cement	29.3	15	14.65	8.37418
2015-03-26	5768	57.66	BB	M	Tourtouse	8.1	10.45	1	Cement	19.1	7	9.55	6.37265
2015-03-26	5768	57.66	BB	M	Tourtouse	8.1	10.45	2	Cement	19.9	10	9.95	6.37265
2015-03-27	5768	57.66	BB	M	Tourtouse	8.1	10.45	3	Cement	21.5	10	10.75	6.37265
2015-03-26	5741	60.36	BB	M	Tourtouse	8.2	10.7	1	Cement	21.1	9	10.55	4.55076
2015-03-26	5741	60.36	BB	M	Tourtouse	8.2	10.7	2	Cement	23.2	12	11.6	4.55076
2015-03-27	5741	60.36	BB	M	Tourtouse	8.2	10.7	3	Cement	26.7	12	13.35	4.55076
2015-03-26	6579	67.1	BB	M	Tourtouse	8.5	9.5	1	Cement	29.2	8	14.6	1.6505
2015-03-26	6579	67.1	BB	M	Tourtouse	8.5	9.5	2	Cement	25.3	11	12.65	1.6505
2015-03-27	6579	67.1	BB	M	Tourtouse	8.5	9.5	3	Cement	28.6	13	14.3	1.6505
2015-03-26	6062	62.55	BB	M	Tourtouse	7.8	11.1	1	Cement	9.5	5	4.75	22.4179
2015-03-26	6062	62.55	BB	M	Tourtouse	7.8	11.1	2	Cement	17	8	8.5	22.4179
2015-03-27	6062	62.55	BB	M	Tourtouse	7.8	11.1	3	Cement	14.7	4	7.35	22.4179
2015-03-26	5929	49.95	BB	M	Tourtouse	7.4	9.95	1	Cement	15.9	8	7.95	92.3814
2015-03-26	5929	49.95	BB	M	Tourtouse	7.4	9.95	2	Cement	40.6	14	20.3	92.3814
2015-03-27	5929	49.95	BB	M	Tourtouse	7.4	9.95	3	Cement	19.7	8	9.85	92.3814
2015-03-26	6486	60.2	BB	M	Tourtouse	7.8	10.8	1	Cement	19.8	11	9.9	21.5756
2015-03-26	6486	60.2	BB	M	Tourtouse	7.8	10.8	2	Cement	22.9	12	11.45	21.5756
2015-03-27	6486	60.2	BB	M	Tourtouse	7.8	10.8	3	Cement	27.6	11	13.8	21.5756
2015-03-26	6111	51.51	BB	M	Tourtouse	7.9	10.4	1	Cement	25.1	9	12.55	12.4108
2015-03-26	6111	51.51	BB	M	Tourtouse	7.9	10.4	2	Cement	25.8	13	12.9	12.4108
2015-03-27	6111	51.51	BB	M	Tourtouse	7.9	10.4	3	Cement	32.6	15	16.3	12.4108
2015-03-26	6518	51.66	BB	M	Tourtouse	8	9.4	1	Cement	13.4	5	6.7	8.40957
2015-03-26	6518	51.66	BB	M	Tourtouse	8	9.4	2	Cement	10.6	3	5.3	8.40957
2015-03-27	6518	51.66	BB	M	Tourtouse	8	9.4	3	Cement	18.9	7	9.45	8.40957
2015-03-26	6295	54.86	BB	M	Tourtouse	7.5	10.4	1	Cement	13.7	7	6.85	66.7708
2015-03-26	6295	54.86	BB	M	Tourtouse	7.5	10.4	2	Cement	16.4	10	8.2	66.7708
2015-03-27	6295	54.86	BB	M	Tourtouse	7.5	10.4	3	Cement	17.8	8	8.9	66.7708
2015-03-26	6314	48.91	BB	M	Tourtouse	7.3	10.3	1	Cement	13.5	5	6.75	138.241
2015-03-26	6314	48.91	BB	M	Tourtouse	7.3	10.3	2	Cement	29.2	11	14.6	138.241
2015-03-27	6314	48.91	BB	M	Tourtouse	7.3	10.3	3	Cement	15.4	9	7.7	138.241
2015-03-26	5751	54.96	BB	M	Tourtouse	8.1	10.75	1	Cement	10.2	4	5.1	6.07424
2015-03-26	5751	54.96	BB	M	Tourtouse	8.1	10.75	2	Cement	12.5	3	6.25	6.07424
2015-03-27	5751	54.96	BB	M	Tourtouse	8.1	10.75	3	Cement	16.9	10	8.45	6.07424
2015-03-26	6623	49.34	BB	M	Tourtouse	7.55	10.1	1	Cement	25.7	7	12.85	48.8177
2015-03-26	6623	49.34	BB	M	Tourtouse	7.55	10.1	2	Cement	44.1	14	22.05	48.8177
2015-03-27	6623	49.34	BB	M	Tourtouse	7.55	10.1	3	Cement	27.5	11	13.75	48.8177
2015-03-26	6606	50.45	BB	M	Tourtouse	7.9	9.9	1	Cement	24.5	9	12.25	12.1554
2015-03-26	6606	50.45	BB	M	Tourtouse	7.9	9.9	2	Cement	24.8	12	12.4	12.1554
2015-03-27	6606	50.45	BB	M	Tourtouse	7.9	9.9	3	Cement	14.4	6	7.2	12.1554
2015-03-26	5670	41.13	BB	M	Tourtouse	7.1	9.6	1	Cement	15.3	7	7.65	276.359
2015-03-26	5670	41.13	BB	M	Tourtouse	7.1	9.6	2	Cement	23.6	12	11.8	276.359
2015-03-27	5670	41.13	BB	M	Tourtouse	7.1	9.6	3	Cement	27.9	12	13.95	276.359
2015-03-26	6118	54.54	BB	M	Tourtouse	8.35	10.1	1	Cement	14.8	8	7.4	2.33692
2015-03-26	6118	54.54	BB	M	Tourtouse	8.35	10.1	2	Cement	19.7	10	9.85	2.33692
2015-03-27	6118	54.54	BB	M	Tourtouse	8.35	10.1	3	Cement	16.3	2	8.15	2.33692
2015-03-26	6462	48.06	BB	M	Tourtouse	7.65	9.9	1	Cement	21.5	7	10.75	31.5522
2015-03-26	6462	48.06	BB	M	Tourtouse	7.65	9.9	2	Cement	21.9	13	10.95	31.5522
2015-03-27	6462	48.06	BB	M	Tourtouse	7.65	9.9	3	Cement	21	10	10.5	31.5522
2015-03-27	6427	39.72	BB	M	Tourtouse	7.3	9.25	1	Cement	29.2	10	14.6	112.266
2015-03-27	6427	39.72	BB	M	Tourtouse	7.3	9.25	2	Cement	21	10	10.5	112.266
2015-03-27	6427	39.72	BB	M	Tourtouse	7.3	9.25	3	Cement	21	7	10.5	112.266
2015-03-28	753	200	BB	F	Ordan-Larroque	12.2	10.9	1	Cement	37.6	15	18.8	6.31e-05
2015-03-29	753	200	BB	F	Ordan-Larroque	12.2	10.9	2	Cement	50	15	25	6.31e-05
2015-03-29	753	200	BB	F	Ordan-Larroque	12.2	10.9	3	Cement	17.4	8	8.7	6.31e-05
2015-03-28	6350	116.91	BB	F	Ordan-Larroque	9.4	11.4	1	Cement	19.2	7	9.6	0.12481
2015-03-29	6350	116.91	BB	F	Ordan-Larroque	9.4	11.4	2	Cement	49.9	13	24.95	0.12481
2015-03-29	6350	116.91	BB	F	Ordan-Larroque	9.4	11.4	3	Cement	42.2	12	21.1	0.12481
2015-03-28	6489	98.28	BB	F	Ordan-Larroque	9.7	10.8	1	Cement	31.3	13	15.65	0.0394055
2015-03-29	6489	98.28	BB	F	Ordan-Larroque	9.7	10.8	2	Cement	50.6	17	25.3	0.0394055
2015-03-29	6489	98.28	BB	F	Ordan-Larroque	9.7	10.8	3	Cement	23.7	15	11.85	0.0394055
2015-03-28	6617	66.49	BB	F	Ordan-Larroque	7.9	10	1	Cement	24.9	16	12.45	16.0201
2015-03-29	6617	66.49	BB	F	Ordan-Larroque	7.9	10	2	Cement	39	13	19.5	16.0201
2015-03-29	6617	66.49	BB	F	Ordan-Larroque	7.9	10	3	Cement	26.1	13	13.05	16.0201
2015-03-28	6389	89.91	BB	F	Ordan-Larroque	8.4	9	1	Cement	30	14	15	3.19826
2015-03-29	6389	89.91	BB	F	Ordan-Larroque	8.4	9	2	Cement	38.5	14	19.25	3.19826
2015-03-29	6389	89.91	BB	F	Ordan-Larroque	8.4	9	3	Cement	34.3	17	17.15	3.19826
2015-03-28	731	54.9	BB	F	Ordan-Larroque	7.3	8.5	1	Cement	10.4	5	5.2	155.172
2015-03-29	731	54.9	BB	F	Ordan-Larroque	7.3	8.5	2	Cement	11.5	7	5.75	155.172
2015-03-29	731	54.9	BB	F	Ordan-Larroque	7.3	8.5	3	Cement	19.9	12	9.95	155.172
2015-03-28	745	71.01	BB	F	Ordan-Larroque	8.7	9.9	1	Cement	29.1	10	14.55	0.845991
2015-03-29	745	71.01	BB	F	Ordan-Larroque	8.7	9.9	2	Cement	23.3	10	11.65	0.845991
2015-03-29	745	71.01	BB	F	Ordan-Larroque	8.7	9.9	3	Cement	41.3	16	20.65	0.845991
2015-03-28	6144	70.52	BB	F	Ordan-Larroque	8	9.3	1	Cement	21	8	10.5	11.4797
2015-03-29	6144	70.52	BB	F	Ordan-Larroque	8	9.3	2	Cement	31	15	15.5	11.4797
2015-03-29	6144	70.52	BB	F	Ordan-Larroque	8	9.3	3	Cement	23.3	15	11.65	11.4797
2015-03-28	5922	45.12	BB	F	Ordan-Larroque	7.4	8.3	1	Cement	26.4	11	13.2	83.4484
2015-03-29	5922	45.12	BB	F	Ordan-Larroque	7.4	8.3	2	Cement	25.9	8	12.95	83.4484
2015-03-29	5922	45.12	BB	F	Ordan-Larroque	7.4	8.3	3	Cement	33.2	14	16.6	83.4484
2015-03-28	5771	27.6	BB	M	Ordan-Larroque	6.2	8.2	1	Cement	22.2	4	11.1	12682.8
2015-03-29	5771	27.6	BB	M	Ordan-Larroque	6.2	8.2	2	Cement	23.5	11	11.75	12682.8
2015-03-29	5771	27.6	BB	M	Ordan-Larroque	6.2	8.2	3	Cement	17.4	5	8.7	12682.8
2015-03-28	6073	46.16	BB	M	Ordan-Larroque	7.3	9.5	1	Cement	44.3	16	22.15	130.469
2015-03-29	6073	46.16	BB	M	Ordan-Larroque	7.3	9.5	2	Cement	28.5	15	14.25	130.469
2015-03-29	6073	46.16	BB	M	Ordan-Larroque	7.3	9.5	3	Cement	25.2	12	12.6	130.469
2015-03-28	6370	40.07	BB	M	Ordan-Larroque	7	9.1	1	Cement	36	15	18	418.951
2015-03-29	6370	40.07	BB	M	Ordan-Larroque	7	9.1	2	Cement	29	11	14.5	418.951
2015-03-29	6370	40.07	BB	M	Ordan-Larroque	7	9.1	3	Cement	21.9	12	10.95	418.951
2015-03-28	5694	50.11	BB	M	Ordan-Larroque	7.6	9.2	1	Cement	15.6	8	7.8	40.3593
2015-03-29	5694	50.11	BB	M	Ordan-Larroque	7.6	9.2	2	Cement	17.9	5	8.95	40.3593
2015-03-29	5694	50.11	BB	M	Ordan-Larroque	7.6	9.2	3	Cement	14.8	6	7.4	40.3593
2015-03-28	6033	48.61	BB	F	Ordan-Larroque	7.6	7.9	1	Cement	28.1	13	14.05	39.1512
2015-03-29	6033	48.61	BB	F	Ordan-Larroque	7.6	7.9	2	Cement	20.6	12	10.3	39.1512
2015-03-29	6033	48.61	BB	F	Ordan-Larroque	7.6	7.9	3	Cement	23.3	13	11.65	39.1512
2015-03-28	5967	42.79	BB	M	Ordan-Larroque	6.6	8.9	1	Cement	34.3	13	17.15	2800.65
2015-03-29	5967	42.79	BB	M	Ordan-Larroque	6.6	8.9	2	Cement	22.4	8	11.2	2800.65
2015-03-29	5967	42.79	BB	M	Ordan-Larroque	6.6	8.9	3	Cement	19.6	8	9.8	2800.65
2015-03-28	6535	49.1	BB	M	Ordan-Larroque	7.8	9.2	1	Cement	16.7	8	8.35	17.5974
2015-03-29	6535	49.1	BB	M	Ordan-Larroque	7.8	9.2	2	Cement	14.2	3	7.1	17.5974
2015-03-29	6535	49.1	BB	M	Ordan-Larroque	7.8	9.2	3	Cement	11.9	4	5.95	17.5974
2015-03-28	5800	50.19	BB	M	Ordan-Larroque	7.6	10	1	Cement	25.8	11	12.9	40.4237
2015-03-29	5800	50.19	BB	M	Ordan-Larroque	7.6	10	2	Cement	28	10	14	40.4237
2015-03-29	5800	50.19	BB	M	Ordan-Larroque	7.6	10	3	Cement	11.8	4	5.9	40.4237
2015-03-28	5761	37.17	BB	M	Ordan-Larroque	6.8	8	1	Cement	21.1	12	10.55	959.323
2015-03-29	5761	37.17	BB	M	Ordan-Larroque	6.8	8	2	Cement	19.8	4	9.9	959.323
2015-03-29	5761	37.17	BB	M	Ordan-Larroque	6.8	8	3	Cement	18.4	6	9.2	959.323
2015-03-28	737	47.15	BB	M	Ordan-Larroque	7.7	9.2	1	Cement	18.7	8	9.35	25.2658
2015-03-29	737	47.15	BB	M	Ordan-Larroque	7.7	9.2	2	Cement	22.1	9	11.05	25.2658
2015-03-29	737	47.15	BB	M	Ordan-Larroque	7.7	9.2	3	Cement	17.9	8	8.95	25.2658
2015-03-28	6097	34.72	BB	M	Ordan-Larroque	6.65	8.5	1	Cement	25	10	12.5	1796.07
2015-03-29	6097	34.72	BB	M	Ordan-Larroque	6.65	8.5	2	Cement	13	5	6.5	1796.07
2015-03-29	6097	34.72	BB	M	Ordan-Larroque	6.65	8.5	3	Cement	23.1	11	11.55	1796.07
2015-03-28	5804	52.07	BB	M	Ordan-Larroque	7.7	9.6	1	Cement	21.2	12	10.6	27.9022
2015-03-29	5804	52.07	BB	M	Ordan-Larroque	7.7	9.6	2	Cement	24.9	9	12.45	27.9022
2015-03-29	5804	52.07	BB	M	Ordan-Larroque	7.7	9.6	3	Cement	19	9	9.5	27.9022
2015-03-28	6599	55.77	BB	M	Ordan-Larroque	8	8.7	1	Cement	22.4	13	11.2	9.07862
2015-03-29	6599	55.77	BB	M	Ordan-Larroque	8	8.7	2	Cement	26	7	13	9.07862
2015-03-29	6599	55.77	BB	M	Ordan-Larroque	8	8.7	3	Cement	26.5	12	13.25	9.07862
2015-03-28	6471	49.16	BB	M	Ordan-Larroque	7.8	10.3	1	Cement	12.7	3	6.35	17.6189
2015-03-29	6471	49.16	BB	M	Ordan-Larroque	7.8	10.3	2	Cement	20.7	8	10.35	17.6189
2015-03-29	6471	49.16	BB	M	Ordan-Larroque	7.8	10.3	3	Cement	15.8	7	7.9	17.6189
2015-03-31	6173	24.18	BB	M	Ordan-Larroque	6.15	9.1	1	Cement	20.2	7	10.1	14301.5
2015-03-31	6173	24.18	BB	M	Ordan-Larroque	6.15	9.1	2	Cement	12.6	6	6.3	14301.5
2015-03-31	6173	24.18	BB	M	Ordan-Larroque	6.15	9.1	3	Cement	26.3	9	13.15	14301.5
2015-03-31	6117	41.31	BB	M	Ordan-Larroque	7.7	10.5	1	Cement	34	12	17	22.1364
2015-03-31	6117	41.31	BB	M	Ordan-Larroque	7.7	10.5	2	Cement	19.2	11	9.6	22.1364
2015-03-31	6117	41.31	BB	M	Ordan-Larroque	7.7	10.5	3	Cement	20.6	10	10.3	22.1364
2015-03-31	5926	48.29	BB	M	Ordan-Larroque	8	11	1	Cement	27.9	11	13.95	7.86097
2015-03-31	5926	48.29	BB	M	Ordan-Larroque	8	11	2	Cement	17.8	8	8.9	7.86097
2015-03-31	5926	48.29	BB	M	Ordan-Larroque	8	11	3	Cement	14.4	8	7.2	7.86097
2015-03-31	5896	27.36	BB	M	Ordan-Larroque	6.4	9.2	1	Cement	28.7	10	14.35	4673.2
2015-03-31	5896	27.36	BB	M	Ordan-Larroque	6.4	9.2	2	Cement	20.4	11	10.2	4673.2
2015-03-31	5896	27.36	BB	M	Ordan-Larroque	6.4	9.2	3	Cement	28.5	14	14.25	4673.2
2015-03-31	5811	64.93	BB	M	Ordan-Larroque	8.35	10.9	1	Cement	22.8	10	11.4	2.78211
2015-03-31	5811	64.93	BB	M	Ordan-Larroque	8.35	10.9	2	Cement	20.3	10	10.15	2.78211
2015-03-31	5811	64.93	BB	M	Ordan-Larroque	8.35	10.9	3	Cement	32.8	14	16.4	2.78211
2015-03-31	6328	24.51	BB	M	Ordan-Larroque	6.1	8.8	1	Cement	18.7	12	9.35	18697.4
2015-03-31	6328	24.51	BB	M	Ordan-Larroque	6.1	8.8	2	Cement	14.6	7	7.3	18697.4
2015-03-31	6328	24.51	BB	M	Ordan-Larroque	6.1	8.8	3	Cement	16	8	8	18697.4
2015-03-31	6404	31.15	BB	M	Ordan-Larroque	7.1	9.9	1	Cement	14.7	10	7.35	209.302
2015-03-31	6404	31.15	BB	M	Ordan-Larroque	7.1	9.9	2	Cement	18	10	9	209.302
2015-03-31	6404	31.15	BB	M	Ordan-Larroque	7.1	9.9	3	Cement	15.4	7	7.7	209.302
2015-03-31	6078	73.35	BB	F	Ordan-Larroque	8.6	10	1	Cement	32.2	10	16.1	1.25301
2015-03-31	6078	73.35	BB	F	Ordan-Larroque	8.6	10	2	Cement	29.1	15	14.55	1.25301
2015-03-31	6078	73.35	BB	F	Ordan-Larroque	8.6	10	3	Cement	31.3	14	15.65	1.25301
2015-03-31	6356	40.1	BB	M	Ordan-Larroque	7.1	9.7	1	Cement	29.2	13	14.6	269.438
2015-03-31	6356	40.1	BB	M	Ordan-Larroque	7.1	9.7	2	Cement	23.3	13	11.65	269.438
2015-03-31	6356	40.1	BB	M	Ordan-Larroque	7.1	9.7	3	Cement	22.2	11	11.1	269.438
2015-03-31	5933	30.06	BB	M	Ordan-Larroque	6.6	9.25	1	Cement	12.3	10	6.15	1967.46
2015-03-31	5933	30.06	BB	M	Ordan-Larroque	6.6	9.25	2	Cement	8.5	7	4.25	1967.46
2015-03-31	5933	30.06	BB	M	Ordan-Larroque	6.6	9.25	3	Cement	26.6	10	13.3	1967.46
2015-03-31	6050	34.92	BB	M	Ordan-Larroque	7.05	10.15	1	Cement	15	5	7.5	292.458
2015-03-31	6050	34.92	BB	M	Ordan-Larroque	7.05	10.15	2	Cement	15.9	9	7.95	292.458
2015-03-31	6050	34.92	BB	M	Ordan-Larroque	7.05	10.15	3	Cement	12.9	6	6.45	292.458
2015-03-31	5987	27.36	BB	M	Ordan-Larroque	6.5	9.1	1	Cement	38.8	13	19.4	2882.18
2015-03-31	5987	27.36	BB	M	Ordan-Larroque	6.5	9.1	2	Cement	27.8	12	13.9	2882.18
2015-03-31	5987	27.36	BB	M	Ordan-Larroque	6.5	9.1	3	Cement	15.1	6	7.55	2882.18
2015-03-31	6514	31.44	BB	M	Ordan-Larroque	6.7	9.3	1	Cement	12.1	8	6.05	1287.71
2015-03-31	6514	31.44	BB	M	Ordan-Larroque	6.7	9.3	2	Cement	14.3	8	7.15	1287.71
2015-03-31	6514	31.44	BB	M	Ordan-Larroque	6.7	9.3	3	Cement	18.1	8	9.05	1287.71
2015-03-31	5728	55.87	BB	M	Ordan-Larroque	7.9	10.85	1	Cement	22	11	11	13.4613
2015-03-31	5728	55.87	BB	M	Ordan-Larroque	7.9	10.85	2	Cement	20.8	9	10.4	13.4613
2015-03-31	5728	55.87	BB	M	Ordan-Larroque	7.9	10.85	3	Cement	20.6	9	10.3	13.4613
2015-03-31	5997	32.92	BB	M	Ordan-Larroque	6.85	9.5	1	Cement	16.9	10	8.45	676.166
2015-03-31	5997	32.92	BB	M	Ordan-Larroque	6.85	9.5	2	Cement	18.4	12	9.2	676.166
2015-03-31	5997	32.92	BB	M	Ordan-Larroque	6.85	9.5	3	Cement	16.3	6	8.15	676.166
2015-03-18	5701	66.55	BB	M	Tourtouse	8.1	10.9	1	Dry soil	22.3	7	11.15	7.35518
2015-03-18	5701	66.55	BB	M	Tourtouse	8.1	10.9	2	Dry soil	22	9	11	7.35518
2015-03-19	5701	66.55	BB	M	Tourtouse	8.1	10.9	3	Dry soil	19.7	6	9.85	7.35518
2015-03-18	5788	59.92	BB	M	Tourtouse	8	10.6	1	Dry soil	12.8	5	6.4	9.75418
2015-03-18	5788	59.92	BB	M	Tourtouse	8	10.6	2	Dry soil	15	5	7.5	9.75418
2015-03-19	5788	59.92	BB	M	Tourtouse	8	10.6	3	Dry soil	12.4	8	6.2	9.75418
2015-03-18	5910	57.49	BB	M	Tourtouse	8	10.5	1	Dry soil	18.3	11	9.15	9.35861
2015-03-18	5910	57.49	BB	M	Tourtouse	8	10.5	2	Dry soil	26.3	13	13.15	9.35861
2015-03-19	5910	57.49	BB	M	Tourtouse	8	10.5	3	Dry soil	25.5	15	12.75	9.35861
2015-03-18	5950	41.52	BB	M	Tourtouse	7.25	9.55	1	Dry soil	12.3	2	6.15	145.392
2015-03-18	5950	41.52	BB	M	Tourtouse	7.25	9.55	2	Dry soil	17.2	3	8.6	145.392
2015-03-19	5950	41.52	BB	M	Tourtouse	7.25	9.55	3	Dry soil	16.8	4	8.4	145.392
2015-03-18	5759	47.34	BB	M	Tourtouse	7.35	10.3	1	Dry soil	13.8	5	6.9	108.158
2015-03-18	5759	47.34	BB	M	Tourtouse	7.35	10.3	2	Dry soil	16.3	6	8.15	108.158
2015-03-19	5759	47.34	BB	M	Tourtouse	7.35	10.3	3	Dry soil	13.2	4	6.6	108.158
2015-03-18	5780	42.87	BB	M	Tourtouse	7.2	10.05	1	Dry soil	19.1	10	9.55	186.262
2015-03-18	5780	42.87	BB	M	Tourtouse	7.2	10.05	2	Dry soil	21.4	10	10.7	186.262
2015-03-19	5780	42.87	BB	M	Tourtouse	7.2	10.05	3	Dry soil	16	8	8	186.262
2015-03-18	6290	60.51	BB	M	Tourtouse	8	11.1	1	Dry soil	15.2	12	7.6	9.85023
2015-03-18	6290	60.51	BB	M	Tourtouse	8	11.1	2	Dry soil	18.8	11	9.4	9.85023
2015-03-19	6290	60.51	BB	M	Tourtouse	8	11.1	3	Dry soil	21.9	12	10.95	9.85023
2015-03-18	6234	46.75	BB	M	Tourtouse	7.6	10.8	1	Dry soil	19.6	9	9.8	37.6531
2015-03-18	6234	46.75	BB	M	Tourtouse	7.6	10.8	2	Dry soil	27.7	12	13.85	37.6531
2015-03-19	6234	46.75	BB	M	Tourtouse	7.6	10.8	3	Dry soil	23	9	11.5	37.6531
2015-03-18	5819	35.18	BB	M	Tourtouse	7.2	9.3	1	Dry soil	14.9	6	7.45	152.851
2015-03-18	5819	35.18	BB	M	Tourtouse	7.2	9.3	2	Dry soil	15.3	7	7.65	152.851
2015-03-19	5819	35.18	BB	M	Tourtouse	7.2	9.3	3	Dry soil	17.9	8	8.95	152.851
2015-03-18	6011	38.86	BB	M	Mas_d_Azil	7.6	9.5	1	Dry soil	15.6	7	7.8	31.2984
2015-03-18	6011	38.86	BB	M	Mas_d_Azil	7.6	9.5	2	Dry soil	17.5	9	8.75	31.2984
2015-03-19	6011	38.86	BB	M	Mas_d_Azil	7.6	9.5	3	Dry soil	12.8	6	6.4	31.2984
2015-03-18	6194	43.5	BB	M	Tourtouse	7.6	10.4	1	Dry soil	19.7	10	9.85	35.0355
2015-03-18	6194	43.5	BB	M	Tourtouse	7.6	10.4	2	Dry soil	26.1	12	13.05	35.0355
2015-03-19	6194	43.5	BB	M	Tourtouse	7.6	10.4	3	Dry soil	22.6	10	11.3	35.0355
2015-03-18	6375	43.05	BB	M	Tourtouse	7.4	9.9	1	Dry soil	20.4	4	10.2	79.62
2015-03-18	6375	43.05	BB	M	Tourtouse	7.4	9.9	2	Dry soil	26.4	11	13.2	79.62
2015-03-19	6375	43.05	BB	M	Tourtouse	7.4	9.9	3	Dry soil	28.2	11	14.1	79.62
2015-03-18	6530	39.99	BB	M	Tourtouse	7.3	9.7	1	Dry soil	16	8	8	113.029
2015-03-18	6530	39.99	BB	M	Tourtouse	7.3	9.7	2	Dry soil	17.5	7	8.75	113.029
2015-03-19	6530	39.99	BB	M	Tourtouse	7.3	9.7	3	Dry soil	17.5	10	8.75	113.029
2015-03-18	6254	53.26	BB	M	Tourtouse	8	10.75	1	Dry soil	12.6	2	6.3	8.67002
2015-03-18	6254	53.26	BB	M	Tourtouse	8	10.75	2	Dry soil	14.4	4	7.2	8.67002
2015-03-19	6254	53.26	BB	M	Tourtouse	8	10.75	3	Dry soil	21	8	10.5	8.67002
2015-03-26	5749	56.25	BB	M	Tourtouse	8.3	10.2	1	Dry soil	32.1	10	16.05	2.90643
2015-03-26	5749	56.25	BB	M	Tourtouse	8.3	10.2	2	Dry soil	19.3	7	9.65	2.90643
2015-03-27	5749	56.25	BB	M	Tourtouse	8.3	10.2	3	Dry soil	10.5	0	5.25	2.90643
2015-03-26	797	51.34	BB	M	Tourtouse	7.8	10.6	1	Dry soil	19	10	9.5	18.4002
2015-03-26	797	51.34	BB	M	Tourtouse	7.8	10.6	2	Dry soil	16	10	8	18.4002
2015-03-27	797	51.34	BB	M	Tourtouse	7.8	10.6	3	Dry soil	12.7	13	6.35	18.4002
2015-03-26	6236	74.46	BB	M	Tourtouse	8.9	11.1	1	Dry soil	23.8	11	11.9	0.436795
2015-03-26	6236	74.46	BB	M	Tourtouse	8.9	11.1	2	Dry soil	31.7	14	15.85	0.436795
2015-03-27	6236	74.46	BB	M	Tourtouse	8.9	11.1	3	Dry soil	28.7	11	14.35	0.436795
2015-03-26	6613	58.63	BB	M	Tourtouse	7.9	10.6	1	Dry soil	11.6	5	5.8	14.1263
2015-03-26	6613	58.63	BB	M	Tourtouse	7.9	10.6	2	Dry soil	29.5	13	14.75	14.1263
2015-03-27	6613	58.63	BB	M	Tourtouse	7.9	10.6	3	Dry soil	21.6	12	10.8	14.1263
2015-03-26	6469	75.2	BB	M	Tourtouse	8.9	11.2	1	Dry soil	24.1	7	12.05	0.441136
2015-03-26	6469	75.2	BB	M	Tourtouse	8.9	11.2	2	Dry soil	41.5	14	20.75	0.441136
2015-03-27	6469	75.2	BB	M	Tourtouse	8.9	11.2	3	Dry soil	20.8	9	10.4	0.441136
2015-03-26	6261	50.73	BB	M	Tourtouse	8	10.7	1	Dry soil	25.7	10	12.85	8.25817
2015-03-26	6261	50.73	BB	M	Tourtouse	8	10.7	2	Dry soil	19.5	10	9.75	8.25817
2015-03-27	6261	50.73	BB	M	Tourtouse	8	10.7	3	Dry soil	30.8	13	15.4	8.25817
2015-03-26	6273	56.33	BB	M	Tourtouse	8.1	11.2	1	Dry soil	12.3	5	6.15	6.22565
2015-03-26	6273	56.33	BB	M	Tourtouse	8.1	11.2	2	Dry soil	13.4	3	6.7	6.22565
2015-03-27	6273	56.33	BB	M	Tourtouse	8.1	11.2	3	Dry soil	13.5	4	6.75	6.22565
2015-03-26	6285	62.47	BB	M	Tourtouse	8.05	10.85	1	Dry soil	23.3	8	11.65	8.37418
2015-03-26	6285	62.47	BB	M	Tourtouse	8.05	10.85	2	Dry soil	28.1	11	14.05	8.37418
2015-03-27	6285	62.47	BB	M	Tourtouse	8.05	10.85	3	Dry soil	16	10	8	8.37418
2015-03-26	5768	57.66	BB	M	Tourtouse	8.1	10.45	1	Dry soil	14.9	8	7.45	6.37265
2015-03-26	5768	57.66	BB	M	Tourtouse	8.1	10.45	2	Dry soil	14.1	8	7.05	6.37265
2015-03-27	5768	57.66	BB	M	Tourtouse	8.1	10.45	3	Dry soil	19.8	10	9.9	6.37265
2015-03-26	5741	60.36	BB	M	Tourtouse	8.2	10.7	1	Dry soil	26.3	9	13.15	4.55076
2015-03-26	5741	60.36	BB	M	Tourtouse	8.2	10.7	2	Dry soil	25.9	10	12.95	4.55076
2015-03-27	5741	60.36	BB	M	Tourtouse	8.2	10.7	3	Dry soil	19.5	10	9.75	4.55076
2015-03-26	6579	67.1	BB	M	Tourtouse	8.5	9.5	1	Dry soil	24.5	10	12.25	1.6505
2015-03-26	6579	67.1	BB	M	Tourtouse	8.5	9.5	2	Dry soil	17.7	10	8.85	1.6505
2015-03-27	6579	67.1	BB	M	Tourtouse	8.5	9.5	3	Dry soil	20.3	11	10.15	1.6505
2015-03-26	6062	62.55	BB	M	Tourtouse	7.8	11.1	1	Dry soil	9.5	5	4.75	22.4179
2015-03-26	6062	62.55	BB	M	Tourtouse	7.8	11.1	2	Dry soil	16	9	8	22.4179
2015-03-27	6062	62.55	BB	M	Tourtouse	7.8	11.1	3	Dry soil	14.5	6	7.25	22.4179
2015-03-26	5929	49.95	BB	M	Tourtouse	7.4	9.95	1	Dry soil	16.5	7	8.25	92.3814
2015-03-26	5929	49.95	BB	M	Tourtouse	7.4	9.95	2	Dry soil	33.8	14	16.9	92.3814
2015-03-27	5929	49.95	BB	M	Tourtouse	7.4	9.95	3	Dry soil	18.7	8	9.35	92.3814
2015-03-26	6486	60.2	BB	M	Tourtouse	7.8	10.8	1	Dry soil	18.9	10	9.45	21.5756
2015-03-26	6486	60.2	BB	M	Tourtouse	7.8	10.8	2	Dry soil	15.9	7	7.95	21.5756
2015-03-27	6486	60.2	BB	M	Tourtouse	7.8	10.8	3	Dry soil	19.8	12	9.9	21.5756
2015-03-26	6111	51.51	BB	M	Tourtouse	7.9	10.4	1	Dry soil	16.4	10	8.2	12.4108
2015-03-26	6111	51.51	BB	M	Tourtouse	7.9	10.4	2	Dry soil	31.4	14	15.7	12.4108
2015-03-27	6111	51.51	BB	M	Tourtouse	7.9	10.4	3	Dry soil	24.8	13	12.4	12.4108
2015-03-26	6518	51.66	BB	M	Tourtouse	8	9.4	1	Dry soil	14.7	8	7.35	8.40957
2015-03-26	6518	51.66	BB	M	Tourtouse	8	9.4	2	Dry soil	13.7	6	6.85	8.40957
2015-03-27	6518	51.66	BB	M	Tourtouse	8	9.4	3	Dry soil	19.2	7	9.6	8.40957
2015-03-26	6295	54.86	BB	M	Tourtouse	7.5	10.4	1	Dry soil	13.9	8	6.95	66.7708
2015-03-26	6295	54.86	BB	M	Tourtouse	7.5	10.4	2	Dry soil	15.4	7	7.7	66.7708
2015-03-27	6295	54.86	BB	M	Tourtouse	7.5	10.4	3	Dry soil	21.9	11	10.95	66.7708
2015-03-26	6314	48.91	BB	M	Tourtouse	7.3	10.3	1	Dry soil	11.2	6	5.6	138.241
2015-03-26	6314	48.91	BB	M	Tourtouse	7.3	10.3	2	Dry soil	18.3	11	9.15	138.241
2015-03-27	6314	48.91	BB	M	Tourtouse	7.3	10.3	3	Dry soil	16.2	10	8.1	138.241
2015-03-26	5751	54.96	BB	M	Tourtouse	8.1	10.75	1	Dry soil	12.3	3	6.15	6.07424
2015-03-26	5751	54.96	BB	M	Tourtouse	8.1	10.75	2	Dry soil	15.6	6	7.8	6.07424
2015-03-27	5751	54.96	BB	M	Tourtouse	8.1	10.75	3	Dry soil	13	6	6.5	6.07424
2015-03-26	6623	49.34	BB	M	Tourtouse	7.55	10.1	1	Dry soil	25.1	10	12.55	48.8177
2015-03-26	6623	49.34	BB	M	Tourtouse	7.55	10.1	2	Dry soil	18.7	13	9.35	48.8177
2015-03-27	6623	49.34	BB	M	Tourtouse	7.55	10.1	3	Dry soil	18.4	13	9.2	48.8177
2015-03-26	6606	50.45	BB	M	Tourtouse	7.9	9.9	1	Dry soil	22.2	9	11.1	12.1554
2015-03-26	6606	50.45	BB	M	Tourtouse	7.9	9.9	2	Dry soil	23.3	10	11.65	12.1554
2015-03-27	6606	50.45	BB	M	Tourtouse	7.9	9.9	3	Dry soil	14.8	6	7.4	12.1554
2015-03-26	5670	41.13	BB	M	Tourtouse	7.1	9.6	1	Dry soil	14.9	6	7.45	276.359
2015-03-26	5670	41.13	BB	M	Tourtouse	7.1	9.6	2	Dry soil	16.3	10	8.15	276.359
2015-03-27	5670	41.13	BB	M	Tourtouse	7.1	9.6	3	Dry soil	27.1	14	13.55	276.359
2015-03-26	6118	54.54	BB	M	Tourtouse	8.35	10.1	1	Dry soil	15.3	7	7.65	2.33692
2015-03-26	6118	54.54	BB	M	Tourtouse	8.35	10.1	2	Dry soil	16.8	10	8.4	2.33692
2015-03-27	6118	54.54	BB	M	Tourtouse	8.35	10.1	3	Dry soil	16.6	5	8.3	2.33692
2015-03-26	6462	48.06	BB	M	Tourtouse	7.65	9.9	1	Dry soil	24.9	8	12.45	31.5522
2015-03-26	6462	48.06	BB	M	Tourtouse	7.65	9.9	2	Dry soil	18.5	11	9.25	31.5522
2015-03-27	6462	48.06	BB	M	Tourtouse	7.65	9.9	3	Dry soil	22.7	10	11.35	31.5522
2015-03-27	6427	39.72	BB	M	Tourtouse	7.3	9.25	1	Dry soil	27.8	11	13.9	112.266
2015-03-27	6427	39.72	BB	M	Tourtouse	7.3	9.25	2	Dry soil	19.2	9	9.6	112.266
2015-03-27	6427	39.72	BB	M	Tourtouse	7.3	9.25	3	Dry soil	15	7	7.5	112.266
2015-03-28	753	200	BB	F	Ordan-Larroque	12.2	10.9	1	Dry soil	13	7	6.5	6.31e-05
2015-03-29	753	200	BB	F	Ordan-Larroque	12.2	10.9	2	Dry soil	22.6	11	11.3	6.31e-05
2015-03-29	753	200	BB	F	Ordan-Larroque	12.2	10.9	3	Dry soil	18	10	9	6.31e-05
2015-03-28	6350	116.91	BB	F	Ordan-Larroque	9.4	11.4	1	Dry soil	19.8	10	9.9	0.12481
2015-03-29	6350	116.91	BB	F	Ordan-Larroque	9.4	11.4	2	Dry soil	39.2	12	19.6	0.12481
2015-03-29	6350	116.91	BB	F	Ordan-Larroque	9.4	11.4	3	Dry soil	25.2	10	12.6	0.12481
2015-03-28	6489	98.28	BB	F	Ordan-Larroque	9.7	10.8	1	Dry soil	19.7	14	9.85	0.0394055
2015-03-29	6489	98.28	BB	F	Ordan-Larroque	9.7	10.8	2	Dry soil	29.4	16	14.7	0.0394055
2015-03-29	6489	98.28	BB	F	Ordan-Larroque	9.7	10.8	3	Dry soil	24.6	13	12.3	0.0394055
2015-03-28	6617	66.49	BB	F	Ordan-Larroque	7.9	10	1	Dry soil	23.2	17	11.6	16.0201
2015-03-29	6617	66.49	BB	F	Ordan-Larroque	7.9	10	2	Dry soil	25	11	12.5	16.0201
2015-03-29	6617	66.49	BB	F	Ordan-Larroque	7.9	10	3	Dry soil	22.2	12	11.1	16.0201
2015-03-28	6389	89.91	BB	F	Ordan-Larroque	8.4	9	1	Dry soil	24.3	12	12.15	3.19826
2015-03-29	6389	89.91	BB	F	Ordan-Larroque	8.4	9	2	Dry soil	35.2	14	17.6	3.19826
2015-03-29	6389	89.91	BB	F	Ordan-Larroque	8.4	9	3	Dry soil	36.4	14	18.2	3.19826
2015-03-28	731	54.9	BB	F	Ordan-Larroque	7.3	8.5	1	Dry soil	9.1	6	4.55	155.172
2015-03-29	731	54.9	BB	F	Ordan-Larroque	7.3	8.5	2	Dry soil	20.3	10	10.15	155.172
2015-03-29	731	54.9	BB	F	Ordan-Larroque	7.3	8.5	3	Dry soil	26.8	12	13.4	155.172
2015-03-28	745	71.01	BB	F	Ordan-Larroque	8.7	9.9	1	Dry soil	24	9	12	0.845991
2015-03-29	745	71.01	BB	F	Ordan-Larroque	8.7	9.9	2	Dry soil	21.6	10	10.8	0.845991
2015-03-29	745	71.01	BB	F	Ordan-Larroque	8.7	9.9	3	Dry soil	37.9	14	18.95	0.845991
2015-03-28	6144	70.52	BB	F	Ordan-Larroque	8	9.3	1	Dry soil	19	8	9.5	11.4797
2015-03-29	6144	70.52	BB	F	Ordan-Larroque	8	9.3	2	Dry soil	32.6	15	16.3	11.4797
2015-03-29	6144	70.52	BB	F	Ordan-Larroque	8	9.3	3	Dry soil	31.1	11	15.55	11.4797
2015-03-28	5922	45.12	BB	F	Ordan-Larroque	7.4	8.3	1	Dry soil	28	10	14	83.4484
2015-03-29	5922	45.12	BB	F	Ordan-Larroque	7.4	8.3	2	Dry soil	22.2	7	11.1	83.4484
2015-03-29	5922	45.12	BB	F	Ordan-Larroque	7.4	8.3	3	Dry soil	26.5	12	13.25	83.4484
2015-03-28	5771	27.6	BB	M	Ordan-Larroque	6.2	8.2	1	Dry soil	24.6	7	12.3	12682.8
2015-03-29	5771	27.6	BB	M	Ordan-Larroque	6.2	8.2	2	Dry soil	31.7	10	15.85	12682.8
2015-03-29	5771	27.6	BB	M	Ordan-Larroque	6.2	8.2	3	Dry soil	18	8	9	12682.8
2015-03-28	6073	46.16	BB	M	Ordan-Larroque	7.3	9.5	1	Dry soil	26	11	13	130.469
2015-03-29	6073	46.16	BB	M	Ordan-Larroque	7.3	9.5	2	Dry soil	28.5	10	14.25	130.469
2015-03-29	6073	46.16	BB	M	Ordan-Larroque	7.3	9.5	3	Dry soil	19	8	9.5	130.469
2015-03-28	6370	40.07	BB	M	Ordan-Larroque	7	9.1	1	Dry soil	26.5	10	13.25	418.951
2015-03-29	6370	40.07	BB	M	Ordan-Larroque	7	9.1	2	Dry soil	30.1	12	15.05	418.951
2015-03-29	6370	40.07	BB	M	Ordan-Larroque	7	9.1	3	Dry soil	22.8	9	11.4	418.951
2015-03-28	5694	50.11	BB	M	Ordan-Larroque	7.6	9.2	1	Dry soil	17.5	9	8.75	40.3593
2015-03-29	5694	50.11	BB	M	Ordan-Larroque	7.6	9.2	2	Dry soil	17.1	2	8.55	40.3593
2015-03-29	5694	50.11	BB	M	Ordan-Larroque	7.6	9.2	3	Dry soil	16.4	6	8.2	40.3593
2015-03-28	6033	48.61	BB	F	Ordan-Larroque	7.6	7.9	1	Dry soil	21	13	10.5	39.1512
2015-03-29	6033	48.61	BB	F	Ordan-Larroque	7.6	7.9	2	Dry soil	16.2	11	8.1	39.1512
2015-03-29	6033	48.61	BB	F	Ordan-Larroque	7.6	7.9	3	Dry soil	20.2	13	10.1	39.1512
2015-03-28	5967	42.79	BB	M	Ordan-Larroque	6.6	8.9	1	Dry soil	20.8	11	10.4	2800.65
2015-03-29	5967	42.79	BB	M	Ordan-Larroque	6.6	8.9	2	Dry soil	20.9	10	10.45	2800.65
2015-03-29	5967	42.79	BB	M	Ordan-Larroque	6.6	8.9	3	Dry soil	17.2	8	8.6	2800.65
2015-03-28	6535	49.1	BB	M	Ordan-Larroque	7.8	9.2	1	Dry soil	13.9	7	6.95	17.5974
2015-03-29	6535	49.1	BB	M	Ordan-Larroque	7.8	9.2	2	Dry soil	15.3	4	7.65	17.5974
2015-03-29	6535	49.1	BB	M	Ordan-Larroque	7.8	9.2	3	Dry soil	15.7	7	7.85	17.5974
2015-03-28	5800	50.19	BB	M	Ordan-Larroque	7.6	10	1	Dry soil	13.8	7	6.9	40.4237
2015-03-29	5800	50.19	BB	M	Ordan-Larroque	7.6	10	2	Dry soil	22.1	9	11.05	40.4237
2015-03-29	5800	50.19	BB	M	Ordan-Larroque	7.6	10	3	Dry soil	7.5	4	3.75	40.4237
2015-03-28	5761	37.17	BB	M	Ordan-Larroque	6.8	8	1	Dry soil	17.8	11	8.9	959.323
2015-03-29	5761	37.17	BB	M	Ordan-Larroque	6.8	8	2	Dry soil	16.2	4	8.1	959.323
2015-03-29	5761	37.17	BB	M	Ordan-Larroque	6.8	8	3	Dry soil	14.4	8	7.2	959.323
2015-03-28	737	47.15	BB	M	Ordan-Larroque	7.7	9.2	1	Dry soil	16.1	6	8.05	25.2658
2015-03-29	737	47.15	BB	M	Ordan-Larroque	7.7	9.2	2	Dry soil	17.1	7	8.55	25.2658
2015-03-29	737	47.15	BB	M	Ordan-Larroque	7.7	9.2	3	Dry soil	13.9	6	6.95	25.2658
2015-03-28	6097	34.72	BB	M	Ordan-Larroque	6.65	8.5	1	Dry soil	21.4	12	10.7	1796.07
2015-03-29	6097	34.72	BB	M	Ordan-Larroque	6.65	8.5	2	Dry soil	11.2	3	5.6	1796.07
2015-03-29	6097	34.72	BB	M	Ordan-Larroque	6.65	8.5	3	Dry soil	28.8	13	14.4	1796.07
2015-03-28	5804	52.07	BB	M	Ordan-Larroque	7.7	9.6	1	Dry soil	19.5	10	9.75	27.9022
2015-03-29	5804	52.07	BB	M	Ordan-Larroque	7.7	9.6	2	Dry soil	16.4	6	8.2	27.9022
2015-03-29	5804	52.07	BB	M	Ordan-Larroque	7.7	9.6	3	Dry soil	18	9	9	27.9022
2015-03-28	6599	55.77	BB	M	Ordan-Larroque	8	8.7	1	Dry soil	22.2	11	11.1	9.07862
2015-03-29	6599	55.77	BB	M	Ordan-Larroque	8	8.7	2	Dry soil	17.9	8	8.95	9.07862
2015-03-29	6599	55.77	BB	M	Ordan-Larroque	8	8.7	3	Dry soil	24.2	10	12.1	9.07862
2015-03-28	6471	49.16	BB	M	Ordan-Larroque	7.8	10.3	1	Dry soil	12.4	7	6.2	17.6189
2015-03-29	6471	49.16	BB	M	Ordan-Larroque	7.8	10.3	2	Dry soil	22.1	9	11.05	17.6189
2015-03-29	6471	49.16	BB	M	Ordan-Larroque	7.8	10.3	3	Dry soil	16.2	7	8.1	17.6189
2015-03-31	6173	24.18	BB	M	Ordan-Larroque	6.15	9.1	1	Dry soil	16.8	9	8.4	14301.5
2015-03-31	6173	24.18	BB	M	Ordan-Larroque	6.15	9.1	2	Dry soil	12.8	6	6.4	14301.5
2015-03-31	6173	24.18	BB	M	Ordan-Larroque	6.15	9.1	3	Dry soil	24.4	10	12.2	14301.5
2015-03-31	6117	41.31	BB	M	Ordan-Larroque	7.7	10.5	1	Dry soil	26.9	10	13.45	22.1364
2015-03-31	6117	41.31	BB	M	Ordan-Larroque	7.7	10.5	2	Dry soil	20.1	10	10.05	22.1364
2015-03-31	6117	41.31	BB	M	Ordan-Larroque	7.7	10.5	3	Dry soil	28	11	14	22.1364
2015-03-31	5926	48.29	BB	M	Ordan-Larroque	8	11	1	Dry soil	20.5	9	10.25	7.86097
2015-03-31	5926	48.29	BB	M	Ordan-Larroque	8	11	2	Dry soil	14	8	7	7.86097
2015-03-31	5926	48.29	BB	M	Ordan-Larroque	8	11	3	Dry soil	15.7	7	7.85	7.86097
2015-03-31	5896	27.36	BB	M	Ordan-Larroque	6.4	9.2	1	Dry soil	35.5	12	17.75	4673.2
2015-03-31	5896	27.36	BB	M	Ordan-Larroque	6.4	9.2	2	Dry soil	21	12	10.5	4673.2
2015-03-31	5896	27.36	BB	M	Ordan-Larroque	6.4	9.2	3	Dry soil	27.2	9	13.6	4673.2
2015-03-31	5811	64.93	BB	M	Ordan-Larroque	8.35	10.9	1	Dry soil	20.6	10	10.3	2.78211
2015-03-31	5811	64.93	BB	M	Ordan-Larroque	8.35	10.9	2	Dry soil	21.3	12	10.65	2.78211
2015-03-31	5811	64.93	BB	M	Ordan-Larroque	8.35	10.9	3	Dry soil	29.9	14	14.95	2.78211
2015-03-31	6328	24.51	BB	M	Ordan-Larroque	6.1	8.8	1	Dry soil	18.2	8	9.1	18697.4
2015-03-31	6328	24.51	BB	M	Ordan-Larroque	6.1	8.8	2	Dry soil	21	9	10.5	18697.4
2015-03-31	6328	24.51	BB	M	Ordan-Larroque	6.1	8.8	3	Dry soil	14.7	9	7.35	18697.4
2015-03-31	6404	31.15	BB	M	Ordan-Larroque	7.1	9.9	1	Dry soil	18.3	9	9.15	209.302
2015-03-31	6404	31.15	BB	M	Ordan-Larroque	7.1	9.9	2	Dry soil	15	10	7.5	209.302
2015-03-31	6404	31.15	BB	M	Ordan-Larroque	7.1	9.9	3	Dry soil	12.9	8	6.45	209.302
2015-03-31	6078	73.35	BB	F	Ordan-Larroque	8.6	10	1	Dry soil	27	11	13.5	1.25301
2015-03-31	6078	73.35	BB	F	Ordan-Larroque	8.6	10	2	Dry soil	23.6	12	11.8	1.25301
2015-03-31	6078	73.35	BB	F	Ordan-Larroque	8.6	10	3	Dry soil	25.4	12	12.7	1.25301
2015-03-31	6356	40.1	BB	M	Ordan-Larroque	7.1	9.7	1	Dry soil	30.2	10	15.1	269.438
2015-03-31	6356	40.1	BB	M	Ordan-Larroque	7.1	9.7	2	Dry soil	25.3	11	12.65	269.438
2015-03-31	6356	40.1	BB	M	Ordan-Larroque	7.1	9.7	3	Dry soil	25	11	12.5	269.438
2015-03-31	5933	30.06	BB	M	Ordan-Larroque	6.6	9.25	1	Dry soil	11.3	9	5.65	1967.46
2015-03-31	5933	30.06	BB	M	Ordan-Larroque	6.6	9.25	2	Dry soil	8.1	8	4.05	1967.46
2015-03-31	5933	30.06	BB	M	Ordan-Larroque	6.6	9.25	3	Dry soil	26.2	12	13.1	1967.46
2015-03-31	6050	34.92	BB	M	Ordan-Larroque	7.05	10.15	1	Dry soil	13.5	8	6.75	292.458
2015-03-31	6050	34.92	BB	M	Ordan-Larroque	7.05	10.15	2	Dry soil	14.2	9	7.1	292.458
2015-03-31	6050	34.92	BB	M	Ordan-Larroque	7.05	10.15	3	Dry soil	14.7	7	7.35	292.458
2015-03-31	5987	27.36	BB	M	Ordan-Larroque	6.5	9.1	1	Dry soil	36.8	14	18.4	2882.18
2015-03-31	5987	27.36	BB	M	Ordan-Larroque	6.5	9.1	2	Dry soil	21.4	11	10.7	2882.18
2015-03-31	5987	27.36	BB	M	Ordan-Larroque	6.5	9.1	3	Dry soil	15	6	7.5	2882.18
2015-03-31	6514	31.44	BB	M	Ordan-Larroque	6.7	9.3	1	Dry soil	18.6	11	9.3	1287.71
2015-03-31	6514	31.44	BB	M	Ordan-Larroque	6.7	9.3	2	Dry soil	18	11	9	1287.71
2015-03-31	6514	31.44	BB	M	Ordan-Larroque	6.7	9.3	3	Dry soil	19.6	9	9.8	1287.71
2015-03-31	5728	55.87	BB	M	Ordan-Larroque	7.9	10.85	1	Dry soil	16.9	8	8.45	13.4613
2015-03-31	5728	55.87	BB	M	Ordan-Larroque	7.9	10.85	2	Dry soil	17.8	10	8.9	13.4613
2015-03-31	5728	55.87	BB	M	Ordan-Larroque	7.9	10.85	3	Dry soil	19.8	10	9.9	13.4613
2015-03-31	5997	32.92	BB	M	Ordan-Larroque	6.85	9.5	1	Dry soil	16	9	8	676.166
2015-03-31	5997	32.92	BB	M	Ordan-Larroque	6.85	9.5	2	Dry soil	19.4	14	9.7	676.166
2015-03-31	5997	32.92	BB	M	Ordan-Larroque	6.85	9.5	3	Dry soil	15.3	8	7.65	676.166

## Sheet: TM
Date	ID	Body mass	Species	Sex	Site	SVL	HLL	Replicate	Substrate	Crossing time (sec)	Number of stops	Crossing (cm/sec)	Mi
2015-04-28	3910360	7.51	TM	M	Mas_d_Azil	6.1	2.9	1	Cement	45.1	8	4.43459	5729
2015-05-03	3910360	7.51	TM	M	Mas_d_Azil	6.1	2.9	2	Cement	64	8	3.125	5729
2015-06-01	3910360	7.51	TM	M	Mas_d_Azil	6.1	2.9	3	Cement	45.9	11	4.3573	5729
2015-04-28	3560111	7.58	TM	F	Ordan_Larroque	6.7	2.6	1	Cement	30.3	5	6.60066	310.46
2015-05-29	3560111	7.58	TM	F	Ordan_Larroque	6.7	2.6	2	Cement	41.2	4	4.85437	310.46
2015-05-30	3560111	7.58	TM	F	Ordan_Larroque	6.7	2.6	3	Cement	45.1	4	4.43459	310.46
2015-04-28	3910400	8.37	TM	M	Mas_d_Azil	6.4	3.1	1	Cement	106.8	10	1.87266	1429.63
2015-05-02	3910400	8.37	TM	M	Mas_d_Azil	6.4	3.1	2	Cement	75	4	2.66667	1429.63
2015-05-03	3910400	8.37	TM	M	Mas_d_Azil	6.4	3.1	3	Cement	63	3	3.1746	1429.63
2015-04-28	3891004	8.51	TM	M	Mas_d_Azil	6.3	2.9	1	Cement	37.4	3	5.34759	2374.8
2015-06-01	3891004	8.51	TM	M	Mas_d_Azil	6.3	2.9	2	Cement	61.4	7	3.25733	2374.8
2015-06-02	3891004	8.51	TM	M	Mas_d_Azil	6.3	2.9	3	Cement	40.6	2	4.92611	2374.8
2015-04-30	3910145	9.2	TM	M	Mas_d_Azil	7	2.8	1	Cement	83.7	10	2.38949	96.1904
2015-06-01	3910145	9.2	TM	M	Mas_d_Azil	7	2.8	2	Cement	66	8	3.0303	96.1904
2015-06-02	3910145	9.2	TM	M	Mas_d_Azil	7	2.8	3	Cement	73.2	9	2.73224	96.1904
2015-04-28	3560269	9.38	TM	M	Mas_d_Azil	6.2	3	1	Cement	46.5	6	4.30108	4310.32
2015-05-02	3560269	9.38	TM	M	Mas_d_Azil	6.2	3	2	Cement	95	10	2.10526	4310.32
2015-06-01	3560269	9.38	TM	M	Mas_d_Azil	6.2	3	3	Cement	46.8	8	4.2735	4310.32
2015-04-28	3891021	9.41	TM	F	Mas_d_Azil	6.75	2.7	1	Cement	59.3	7	3.37268	305.684
2015-06-01	3891021	9.41	TM	F	Mas_d_Azil	6.75	2.7	2	Cement	38.5	4	5.19481	305.684
2015-06-02	3891021	9.41	TM	F	Mas_d_Azil	6.75	2.7	3	Cement	41.7	4	4.79616	305.684
2015-05-11	3560285	9.47	TM	M	Ordan_Larroque	6.6	3.15	1	Cement	38.4	7	5.20833	619.822
2015-05-12	3560285	9.47	TM	M	Ordan_Larroque	6.6	3.15	2	Cement	36.4	6	5.49451	619.822
2015-05-29	3560285	9.47	TM	M	Ordan_Larroque	6.6	3.15	3	Cement	107.3	10	1.86393	619.822
2015-05-12	3792718	9.61	TM	F	Ordan_Larroque	6.9	2.7	1	Cement	51	4	3.92157	157.347
2015-05-29	3792718	9.61	TM	F	Ordan_Larroque	6.9	2.7	2	Cement	51.7	11	3.86847	157.347
2015-05-30	3792718	9.61	TM	F	Ordan_Larroque	6.9	2.7	3	Cement	66.3	20	3.01659	157.347
2015-05-11	3910535	10.09	TM	M	Ordan_Larroque	6.1	2.9	1	Cement	42.6	3	4.69484	7697.15
2015-05-12	3910535	10.09	TM	M	Ordan_Larroque	6.1	2.9	2	Cement	43.5	3	4.5977	7697.15
2015-05-29	3910535	10.09	TM	M	Ordan_Larroque	6.1	2.9	3	Cement	76.1	8	2.62812	7697.15
2015-04-30	3560259	10.33	TM	M	Mas_d_Azil	7.1	2.8	1	Cement	109.7	9	1.82315	69.4089
2015-06-01	3560259	10.33	TM	M	Mas_d_Azil	7.1	2.8	2	Cement	59.9	5	3.3389	69.4089
2015-06-02	3560259	10.33	TM	M	Mas_d_Azil	7.1	2.8	3	Cement	56.4	5	3.5461	69.4089
2015-05-11	3909854	10.6	TM	F	Ordan_Larroque	7.15	2.6	1	Cement	52.1	5	3.83877	57.2293
2015-05-12	3909854	10.6	TM	F	Ordan_Larroque	7.15	2.6	2	Cement	36.4	4	5.49451	57.2293
2015-05-29	3909854	10.6	TM	F	Ordan_Larroque	7.15	2.6	3	Cement	48.7	3	4.10678	57.2293
2015-04-30	3563668	10.73	TM	F	Mas_d_Azil	7.05	2.65	1	Cement	66.3	2	3.01659	89.8646
2015-06-01	3563668	10.73	TM	F	Mas_d_Azil	7.05	2.65	2	Cement	64.2	10	3.11526	89.8646
2015-06-02	3563668	10.73	TM	F	Mas_d_Azil	7.05	2.65	3	Cement	100.2	10	1.99601	89.8646
2015-04-30	3910488	11.38	TM	M	Mas_d_Azil	7.3	3.1	1	Cement	90.6	8	2.20751	32.1649
2015-06-01	3910488	11.38	TM	M	Mas_d_Azil	7.3	3.1	2	Cement	126	10	1.5873	32.1649
2015-06-02	3910488	11.38	TM	M	Mas_d_Azil	7.3	3.1	3	Cement	98.4	10	2.03252	32.1649
2015-04-30	3560290	11.95	TM	F	Mas_d_Azil	7.45	2.95	1	Cement	95.5	9	2.09424	17.9165
2015-06-01	3560290	11.95	TM	F	Mas_d_Azil	7.45	2.95	2	Cement	85	14	2.35294	17.9165
2015-06-02	3560290	11.95	TM	F	Mas_d_Azil	7.45	2.95	3	Cement	52	5	3.84615	17.9165
2015-05-11	3563687	12.23	TM	F	Ordan_Larroque	7.1	2.55	1	Cement	67.4	9	2.96736	82.1753
2015-05-12	3563687	12.23	TM	F	Ordan_Larroque	7.1	2.55	2	Cement	59	4	3.38983	82.1753
2015-05-30	3563687	12.23	TM	F	Ordan_Larroque	7.1	2.55	3	Cement	75.3	5	2.65604	82.1753
2015-04-28	3797561	12.67	TM	F	Mas_d_Azil	7.6	3	1	Cement	34.6	3	5.78035	10.2046
2015-05-02	3797561	12.67	TM	F	Mas_d_Azil	7.6	3	2	Cement	76	4	2.63158	10.2046
2015-06-01	3797561	12.67	TM	F	Mas_d_Azil	7.6	3	3	Cement	106.6	10	1.87617	10.2046
2015-04-30	3793285	12.99	TM	F	Mas_d_Azil	7	2.6	1	Cement	120	11	1.66667	135.817
2015-06-01	3793285	12.99	TM	F	Mas_d_Azil	7	2.6	2	Cement	118	10	1.69492	135.817
2015-06-02	3793285	12.99	TM	F	Mas_d_Azil	7	2.6	3	Cement	69.4	8	2.88184	135.817
2015-04-30	3560248	14.69	TM	F	Mas_d_Azil	7.8	3.05	1	Cement	69.5	6	2.8777	5.26489
2015-05-26	3560248	14.69	TM	F	Mas_d_Azil	7.8	3.05	2	Cement	71	9	2.8169	5.26489
2015-05-27	3560248	14.69	TM	F	Mas_d_Azil	7.8	3.05	3	Cement	95	10	2.10526	5.26489
2015-05-01	3909734	16.89	TM	M	Camarade	8.05	3.3	1	Cement	43	5	4.65116	2.26413
2015-06-01	3909734	16.89	TM	M	Camarade	8.05	3.3	2	Cement	58	3	3.44828	2.26413
2015-06-02	3909734	16.89	TM	M	Camarade	8.05	3.3	3	Cement	71.9	7	2.78164	2.26413
2015-04-28	3910360	7.51	TM	M	Mas_d_Azil	6.1	2.9	1	Dry soil	38.2	6	5.2356	5729
2015-05-03	3910360	7.51	TM	M	Mas_d_Azil	6.1	2.9	2	Dry soil	49	5	4.08163	5729
2015-06-01	3910360	7.51	TM	M	Mas_d_Azil	6.1	2.9	3	Dry soil	27	6	7.40741	5729
2015-04-28	3560111	7.58	TM	F	Ordan_Larroque	6.7	2.6	1	Dry soil	58.4	6	3.42466	310.46
2015-05-29	3560111	7.58	TM	F	Ordan_Larroque	6.7	2.6	2	Dry soil	30.2	3	6.62252	310.46
2015-05-30	3560111	7.58	TM	F	Ordan_Larroque	6.7	2.6	3	Dry soil	28.6	2	6.99301	310.46
2015-04-28	3910400	8.37	TM	M	Mas_d_Azil	6.4	3.1	1	Dry soil	120	10	1.66667	1429.63
2015-05-02	3910400	8.37	TM	M	Mas_d_Azil	6.4	3.1	2	Dry soil	46	2	4.34783	1429.63
2015-05-03	3910400	8.37	TM	M	Mas_d_Azil	6.4	3.1	3	Dry soil	42	4	4.7619	1429.63
2015-04-28	3891004	8.51	TM	M	Mas_d_Azil	6.3	2.9	1	Dry soil	52.8	5	3.78788	2374.8
2015-06-01	3891004	8.51	TM	M	Mas_d_Azil	6.3	2.9	2	Dry soil	34.6	4	5.78035	2374.8
2015-06-02	3891004	8.51	TM	M	Mas_d_Azil	6.3	2.9	3	Dry soil	25.5	2	7.84314	2374.8
2015-04-30	3910145	9.2	TM	M	Mas_d_Azil	7	2.8	1	Dry soil	78.7	5	2.5413	96.1904
2015-06-01	3910145	9.2	TM	M	Mas_d_Azil	7	2.8	2	Dry soil	54.3	9	3.68324	96.1904
2015-06-02	3910145	9.2	TM	M	Mas_d_Azil	7	2.8	3	Dry soil	52	7	3.84615	96.1904
2015-04-28	3560269	9.38	TM	M	Mas_d_Azil	6.2	3	1	Dry soil	42.9	4	4.662	4310.32
2015-05-02	3560269	9.38	TM	M	Mas_d_Azil	6.2	3	2	Dry soil	49	6	4.08163	4310.32
2015-06-01	3560269	9.38	TM	M	Mas_d_Azil	6.2	3	3	Dry soil	29.7	4	6.73401	4310.32
2015-04-28	3891021	9.41	TM	F	Mas_d_Azil	6.75	2.7	1	Dry soil	49.2	4	4.06504	305.684
2015-06-01	3891021	9.41	TM	F	Mas_d_Azil	6.75	2.7	2	Dry soil	26.9	3	7.43494	305.684
2015-06-02	3891021	9.41	TM	F	Mas_d_Azil	6.75	2.7	3	Dry soil	27	3	7.40741	305.684
2015-05-11	3560285	9.47	TM	M	Ordan_Larroque	6.6	3.15	1	Dry soil	46.9	7	4.26439	619.822
2015-05-12	3560285	9.47	TM	M	Ordan_Larroque	6.6	3.15	2	Dry soil	48.1	7	4.158	619.822
2015-05-29	3560285	9.47	TM	M	Ordan_Larroque	6.6	3.15	3	Dry soil	62.7	10	3.18979	619.822
2015-05-12	3792718	9.61	TM	F	Ordan_Larroque	6.9	2.7	1	Dry soil	49.3	3	4.0568	157.347
2015-05-29	3792718	9.61	TM	F	Ordan_Larroque	6.9	2.7	2	Dry soil	33.9	12	5.89971	157.347
2015-05-30	3792718	9.61	TM	F	Ordan_Larroque	6.9	2.7	3	Dry soil	40	11	5	157.347
2015-05-11	3910535	10.09	TM	M	Ordan_Larroque	6.1	2.9	1	Dry soil	59.7	4	3.35008	7697.15
2015-05-12	3910535	10.09	TM	M	Ordan_Larroque	6.1	2.9	2	Dry soil	54.5	4	3.66972	7697.15
2015-05-29	3910535	10.09	TM	M	Ordan_Larroque	6.1	2.9	3	Dry soil	47.9	6	4.17537	7697.15
2015-04-30	3560259	10.33	TM	M	Mas_d_Azil	7.1	2.8	1	Dry soil	70	4	2.85714	69.4089
2015-06-01	3560259	10.33	TM	M	Mas_d_Azil	7.1	2.8	2	Dry soil	31.3	4	6.38978	69.4089
2015-06-02	3560259	10.33	TM	M	Mas_d_Azil	7.1	2.8	3	Dry soil	27.2	3	7.35294	69.4089
2015-05-11	3909854	10.6	TM	F	Ordan_Larroque	7.15	2.6	1	Dry soil	55.5	4	3.6036	57.2293
2015-05-12	3909854	10.6	TM	F	Ordan_Larroque	7.15	2.6	2	Dry soil	43.2	3	4.62963	57.2293
2015-05-29	3909854	10.6	TM	F	Ordan_Larroque	7.15	2.6	3	Dry soil	42.4	2	4.71698	57.2293
2015-04-30	3563668	10.73	TM	F	Mas_d_Azil	7.05	2.65	1	Dry soil	58.9	2	3.39559	89.8646
2015-06-01	3563668	10.73	TM	F	Mas_d_Azil	7.05	2.65	2	Dry soil	33.6	4	5.95238	89.8646
2015-06-02	3563668	10.73	TM	F	Mas_d_Azil	7.05	2.65	3	Dry soil	39	4	5.12821	89.8646
2015-04-30	3910488	11.38	TM	M	Mas_d_Azil	7.3	3.1	1	Dry soil	70.6	4	2.83286	32.1649
2015-06-01	3910488	11.38	TM	M	Mas_d_Azil	7.3	3.1	2	Dry soil	95	10	2.10526	32.1649
2015-06-02	3910488	11.38	TM	M	Mas_d_Azil	7.3	3.1	3	Dry soil	74.3	10	2.69179	32.1649
2015-04-30	3560290	11.95	TM	F	Mas_d_Azil	7.45	2.95	1	Dry soil	64.3	2	3.11042	17.9165
2015-06-01	3560290	11.95	TM	F	Mas_d_Azil	7.45	2.95	2	Dry soil	32.4	5	6.17284	17.9165
2015-06-02	3560290	11.95	TM	F	Mas_d_Azil	7.45	2.95	3	Dry soil	48.2	8	4.14938	17.9165
2015-05-11	3563687	12.23	TM	F	Ordan_Larroque	7.1	2.55	1	Dry soil	72.4	7	2.76243	82.1753
2015-05-12	3563687	12.23	TM	F	Ordan_Larroque	7.1	2.55	2	Dry soil	77	4	2.5974	82.1753
2015-05-30	3563687	12.23	TM	F	Ordan_Larroque	7.1	2.55	3	Dry soil	47.8	6	4.1841	82.1753
2015-04-28	3797561	12.67	TM	F	Mas_d_Azil	7.6	3	1	Dry soil	42.2	6	4.73934	10.2046
2015-05-02	3797561	12.67	TM	F	Mas_d_Azil	7.6	3	2	Dry soil	80	5	2.5	10.2046
2015-06-01	3797561	12.67	TM	F	Mas_d_Azil	7.6	3	3	Dry soil	26.5	3	7.54717	10.2046
2015-04-30	3793285	12.99	TM	F	Mas_d_Azil	7	2.6	1	Dry soil	72.7	2	2.75103	135.817
2015-06-01	3793285	12.99	TM	F	Mas_d_Azil	7	2.6	2	Dry soil	45.3	5	4.41501	135.817
2015-06-02	3793285	12.99	TM	F	Mas_d_Azil	7	2.6	3	Dry soil	28.8	5	6.94444	135.817
2015-04-30	3560248	14.69	TM	F	Mas_d_Azil	7.8	3.05	1	Dry soil	68.9	6	2.90276	5.26489
2015-05-26	3560248	14.69	TM	F	Mas_d_Azil	7.8	3.05	2	Dry soil	54.8	7	3.64964	5.26489
2015-05-27	3560248	14.69	TM	F	Mas_d_Azil	7.8	3.05	3	Dry soil	86	9	2.32558	5.26489
2015-05-01	3909734	16.89	TM	M	Camarade	8.05	3.3	1	Dry soil	75	10	2.66667	2.26413
2015-06-01	3909734	16.89	TM	M	Camarade	8.05	3.3	2	Dry soil	33.5	2	5.97015	2.26413
2015-06-02	3909734	16.89	TM	M	Camarade	8.05	3.3	3	Dry soil	45.3	3	4.41501	2.26413
